# Supplementary material for: Dissecting Non-Small Cell Lung Cancer (NSCLC) with Blood Proteomics - From Surgical to Immunotherapeutic Responses
Source: Research Square preprint supplement (doi:10.21203/rs.3.rs-7118825/v1), 2025-08-01
Supplement: Supplementary file 1 [file a57db6501a1928fa3e0e1b31.docx]

Table S1: Confounding factors

| Confounder | Best model | Best model + confounder | | |
| --- | --- | --- | --- | --- |
| *SURGERY* | ***AUC*** | ***AUC*** | ***confounder’s coefficient*** | ***p-value*** |
| PDL1 | 0.8089 | 0.8089 | -0.0041 | 0.821 |
| *Survival* | *0.8086* | *0.8086* | *-0.3432* | *0.854* |
| *Stage* | *0.8177* | *0.8133* | *0.0133* | *0.966* |
| *RECURRENCE* | ***AUC*** | ***AUC*** | ***confounder’s coefficient*** | ***p-value*** |
| *PDL1* | *0.8307* | *0.8153* | *-0.0128* | *0.601* |
| *Survival* | *0.8452* | *0.9166* | *33.4531* | *1* |
| *Stage* | *0.8958* | *0.8958* | *0.0488* | *0.933* |
| *THERAPY RESPONSE* | ***AUC*** | ***AUC*** | ***confounder’s coefficient*** | ***p-value*** |
| *PDL1* | *0.9230* | *0.9230* | *-0.0268* | *0.475* |
| *Survival* | *0.8166* | *0.85* | *-1.1641* | *0.384* |
| *Stage* | ***0.8166*** | ***0.9166*** | ***-1.3004*** | ***0.047*** |
| *SURVIVAL ANALYSIS* | ***Cindex*** | ***Cindex*** | ***confounder’s coefficient*** | ***p-value*** |
| *PDL1* | *0.8725* | *0.8315* | *-0.5485* | *0.271* |
| *Stage* | *0.8725* | *0.9310* | *0.2470* | *0.550* |
